# Supplementary material
Source: HighWire-hosted journal article supplement (doi:10.1101/rna.079906.123)
Supplement: Supplemental_TableS1.xlsx [file Supplemental_TableS1.xlsx]

## Sheet: Sheet1
#	Target	Sequence	Procedure
1	CA-rich oligo	BTN/CCCTAACCCTAACCCTAACCCTAACCCTAA-ddC	TERRA purification oligo
5	betaACTIN	GTGAGGATCTTCATGAGGTAGTCAGTCAGGT	Northern blot probe
18	TeloR	CCCTAACCCTAACCCTAACCCTAACCCTAA	TERRA reverse transcription
123	eGFP	TTTGCTCAGGGCGGACTGGGTGCTC	Northern blot probe
134	GAPDH	CATGAGTCCTTCCACGATACC	Northern blot probe
216	U6	CTCGCTTCGGCAGCACATATA	RT-qPCR
217	U6	GGAACGCTTCACGAATTTGCGT	Northern blot probe, RT-qPCR
703	15q	CAGCGAGATTCTCCCAAGCTAAG	RT-qPCR
704	15q	AACCCTAACCACATGAGCAACG	RT-qPCR
705	XpYp	GCAAAGAGTGAAAGAACGAAGCTT	RT-qPCR
706	XpYp	CCCTCTGAAAGTGGACCAATCA	RT-qPCR
1438	7q_12q	ACAGCCTTTTGGGGTGCCGC	PCR, Northern blot probe
1439	7q_12q	GCACGGCAGTGTGCGGATTG	RT-qPCR
1440	7q_12q	GCACCTGTAATGCTAATGCACTGCC	RT-qPCR
1549	10p18p	CCTTCTAACTGGACTCTGAC	RT-qPCR
1550	10p18p	GCCACAGCGACGGTAAATAA	RT-qPCR
1861	20q	GCAGCTTTCTCAGCACAC	RT-qPCR
1862	20q	TTTGTTCACTGTCGATGCG	RT-qPCR
2161	VNP-TERRA	ACTTGCCTGTCGCTCTATCTTCCCCTAACCCTAACCCTAACCCTAACCCTAA	Reverse transcription for ONT sequencing
2336	7q_12q*	TTTTGTATTGAGGCAGTGCAT	RT-qPCR, RNAseH experiment
2337	7q_12q*	TGCAGACATGACACCCAAAA	RT-qPCR
2370	16p_7q_12q*	CCCGTTTTCCACACTGAACC	RT-qPCR
2371	16p*	CTCCTAAGCACAGACGTTGGG	RT-qPCR
2374	5p*	CATTTGTCTTCCGAGGCTGC	RT-qPCR
2375	5p*	CAAAAGCCCCTCTGAATCCTG	RT-qPCR
2384	7q subtelomere	ATGAGCAATGGGGTGTGTTATATTTTCGGTGTCAT	PCR, cloning
2385	7q subtelomere	GGGTGGCATATTTTGGTCTTATACACTGTGTTCCA	PCR, cloning
2447	7q_12q CpG	GGGTGGCATATTTTGGTCTTATACACTGTGTTCCACAGG	PCR
2468	7q_12q CpG	ATAGAGTAGCTGTGCTATCTCATTG	PCR
2469	7q_12q CpG	CCTGAATATTCAGCGCTGC	PCR
2479	NGS 7q/12q	AAACCCTTCTAACTATTCTCTAACCC	Bisulfite sequencing
2480	NGS 7q/12q	TATTGTGGTTTTTAATTTTTTAGTATGTTGAG	Bisulfite sequencing
*	Designed to match the sequence of TERRA, according to TERRA ONTseq.
