# Supplementary material
Source: HighWire-hosted journal article supplement (doi:10.1101/rna.079906.123)
Supplement: Supplemental_TableS2.xlsx [file Supplemental_TableS2.xlsx]

## Sheet: total
U2OS			HEK			HeLa			SID mock		SID dox			NLS3 mock		NLS3 dox
# reads	593079		# reads	1429319		# reads	2036327		# reads	686710	# reads	582373		# reads	678254	# reads	681150
Uniquely mapped	86818		Uniquely mapped	148789		Uniquely mapped	154083		Uniquely mapped	102276	Uniquely mapped	87392		Uniquely mapped	117265	Uniquely mapped	116071
Non-primary align	263309		Non-primary align	481688		Non-primary align	506974		Non-primary align	319923	Non-primary align	274759		Non-primary align	367504	Non-primary align	363625
# Mapped	350127		# Mapped	630477		# Mapped	661057		# Mapped	422199	# Mapped	362151		# Mapped	484769	# Mapped	479696

## Sheet: u2os
U2OS
	1,2 KB	1,2 KB primary	23,8 KB	#mapped 25KB
1ptel_hub_3671779_hs1_dna	1	0	14433	14434
2ptel_hub_3671779_hs1_dna	8	8	1705	1713
3ptel_hub_3671779_hs1_dna	2	2	7585	7587
4ptel_hub_3671779_hs1_dna	3	2	6817	6820
5ptel_hub_3671779_hs1_dna	282	26	7006	7288
6ptel_hub_3671779_hs1_dna	7	5	18381	18388
7ptel_hub_3671779_hs1_dna	660	32	6614	7274
8ptel_hub_3671779_hs1_dna	947	601	37891	38838
9ptel_hub_3671779_hs1_dna	69	16	1297	1366
10ptel_hub_3671779_hs1_dna	2	2	2561	2563
11ptel_hub_3671779_hs1_dna	122	101	1422	1544
12ptel_hub_3671779_hs1_dna	102	3	5627	5729
13ptel_hub_3671779_hs1_dna	57	12	1068	1125
14ptel_hub_3671779_hs1_dna	214	108	2447	2661
15ptel_hub_3671779_hs1_dna	2	2	6824	6826
16ptel_hub_3671779_hs1_dna	89	6	7588	7677
17ptel_hub_3671779_hs1_dna	13	13	658	671
18ptel_hub_3671779_hs1_dna	6	2	2737	2743
19ptel_hub_3671779_hs1_dna	358	74	1400	1758
20ptel_hub_3671779_hs1_dna	375	86	9920	10295
21ptel_hub_3671779_hs1_dna	9	1	7336	7345
22ptel_hub_3671779_hs1_dna	2756	22	5012	7768
Xptel_hub_3671779_hs1_dna	91	91	19623	19714
1qtel_hub_3671779_hs1_dna	347	8	9817	10164
2qtel_hub_3671779_hs1_dna	3	0	3674	3677
3qtel_hub_3671779_hs1_dna	82	34	1618	1700
4qtel_hub_3671779_hs1_dna	430	242	13128	13558
5qtel_hub_3671779_hs1_dna	613	118	9664	10277
6qtel_hub_3671779_hs1_dna	130	30	14430	14560
7qtel_hub_3671779_hs1_dna	1128	1098	17000	18128
8qtel_hub_3671779_hs1_dna	1453	688	6300	7753
9qtel_hub_3671779_hs1_dna	555	40	4537	5092
10qtel_hub_3671779_hs1_dna	728	57	8964	9692
11qtel_hub_3671779_hs1_dna	16	1	5756	5772
12qtel_hub_3671779_hs1_dna	361	19	8989	9350
13qtel_hub_3671779_hs1_dna	502	79	9842	10344
14qtel_hub_3671779_hs1_dna	1	1	11666	11667
15qtel_hub_3671779_hs1_dna	279	37	1383	1662
16qtel_hub_3671779_hs1_dna	707	206	3861	4568
17qtel_hub_3671779_hs1_dna	425	63	8167	8592
18qtel_hub_3671779_hs1_dna	1227	148	4979	6206
19qtel_hub_3671779_hs1_dna	6	1	7288	7294
20qtel_hub_3671779_hs1_dna	138	14	1274	1412
21qtel_hub_3671779_hs1_dna	333	26	7980	8313
22qtel_hub_3671779_hs1_dna	386	49	7700	8086
Xqtel_hub_3671779_hs1_dna	140	12	7583	7723
TOTAL	16165	4186	351552	367717

## Sheet: hek
HEK
	1,2 KB	1,2 KB primary	23,8 KB	#mapped 25KB
1ptel_hub_3671779_hs1_dna	0	0	30602	30602
2ptel_hub_3671779_hs1_dna	0	0	3691	3691
3ptel_hub_3671779_hs1_dna	0	0	15558	15558
4ptel_hub_3671779_hs1_dna	1	1	12391	12392
5ptel_hub_3671779_hs1_dna	309	41	12578	12887
6ptel_hub_3671779_hs1_dna	23	22	38178	38201
7ptel_hub_3671779_hs1_dna	555	9	13983	14538
8ptel_hub_3671779_hs1_dna	1679	1479	28059	29738
9ptel_hub_3671779_hs1_dna	79	46	3564	3643
10ptel_hub_3671779_hs1_dna	1423	176	4615	6038
11ptel_hub_3671779_hs1_dna	115	89	3850	3965
12ptel_hub_3671779_hs1_dna	130	7	11732	11862
13ptel_hub_3671779_hs1_dna	8	2	257	265
14ptel_hub_3671779_hs1_dna	133	57	1081	1214
15ptel_hub_3671779_hs1_dna	1	0	12401	12402
16ptel_hub_3671779_hs1_dna	109	12	16094	16203
17ptel_hub_3671779_hs1_dna	364	364	1304	1668
18ptel_hub_3671779_hs1_dna	334	40	4925	5259
19ptel_hub_3671779_hs1_dna	513	66	3818	4331
20ptel_hub_3671779_hs1_dna	37	0	21085	21122
21ptel_hub_3671779_hs1_dna	15	4	13048	13063
22ptel_hub_3671779_hs1_dna	5670	49	8022	13692
Xptel_hub_3671779_hs1_dna	255	255	40249	40504
1qtel_hub_3671779_hs1_dna	44	3	20325	20369
2qtel_hub_3671779_hs1_dna	3	0	7858	7861
3qtel_hub_3671779_hs1_dna	66	28	3800	3866
4qtel_hub_3671779_hs1_dna	50	6	12616	12666
5qtel_hub_3671779_hs1_dna	528	9	20350	20878
6qtel_hub_3671779_hs1_dna	130	45	29772	29902
7qtel_hub_3671779_hs1_dna	635	593	34681	35316
8qtel_hub_3671779_hs1_dna	4335	2006	14353	18688
9qtel_hub_3671779_hs1_dna	510	42	9345	9855
10qtel_hub_3671779_hs1_dna	659	72	7421	8080
11qtel_hub_3671779_hs1_dna	13	1	11861	11874
12qtel_hub_3671779_hs1_dna	205	11	15164	15369
13qtel_hub_3671779_hs1_dna	200	16	19682	19882
14qtel_hub_3671779_hs1_dna	1	1	24769	24770
15qtel_hub_3671779_hs1_dna	388	43	3589	3977
16qtel_hub_3671779_hs1_dna	571	33	7923	8494
17qtel_hub_3671779_hs1_dna	155	58	17099	17254
18qtel_hub_3671779_hs1_dna	2612	273	6208	8820
19qtel_hub_3671779_hs1_dna	6	1	14827	14833
20qtel_hub_3671779_hs1_dna	235	39	3429	3664
21qtel_hub_3671779_hs1_dna	45	10	16462	16507
22qtel_hub_3671779_hs1_dna	71	34	15566	15637
Xqtel_hub_3671779_hs1_dna	171	34	15618	15789
TOTAL	23386	6077	633803	657189

## Sheet: hela
HeLa
	1,2 KB	1,2 KB primary	23,8 KB	#mapped 25KB
1ptel_hub_3671779_hs1_dna	0	0	34711	34711
2ptel_hub_3671779_hs1_dna	0	0	4023	4023
3ptel_hub_3671779_hs1_dna	0	0	17792	17792
4ptel_hub_3671779_hs1_dna	0	0	12933	12933
5ptel_hub_3671779_hs1_dna	51	5	13269	13320
6ptel_hub_3671779_hs1_dna	5	5	40671	40676
7ptel_hub_3671779_hs1_dna	156	6	15620	15776
8ptel_hub_3671779_hs1_dna	322	281	25068	25390
9ptel_hub_3671779_hs1_dna	3	0	3176	3179
10ptel_hub_3671779_hs1_dna	5	0	4709	4714
11ptel_hub_3671779_hs1_dna	39	18	3445	3484
12ptel_hub_3671779_hs1_dna	5	0	12426	12431
13ptel_hub_3671779_hs1_dna	4	0	54	58
14ptel_hub_3671779_hs1_dna	1	0	83	84
15ptel_hub_3671779_hs1_dna	0	0	13044	13044
16ptel_hub_3671779_hs1_dna	4	1	17286	17290
17ptel_hub_3671779_hs1_dna	258	258	1581	1839
18ptel_hub_3671779_hs1_dna	10	4	5040	5050
19ptel_hub_3671779_hs1_dna	71	32	3577	3648
20ptel_hub_3671779_hs1_dna	25	4	22860	22885
21ptel_hub_3671779_hs1_dna	7	0	13536	13543
22ptel_hub_3671779_hs1_dna	5962	48	8362	14324
Xptel_hub_3671779_hs1_dna	126	126	45209	45335
1qtel_hub_3671779_hs1_dna	40	0	21102	21142
2qtel_hub_3671779_hs1_dna	3	0	8661	8664
3qtel_hub_3671779_hs1_dna	30	15	4251	4281
4qtel_hub_3671779_hs1_dna	39	2	12688	12727
5qtel_hub_3671779_hs1_dna	137	2	22513	22650
6qtel_hub_3671779_hs1_dna	30	11	33492	33522
7qtel_hub_3671779_hs1_dna	150	142	38736	38886
8qtel_hub_3671779_hs1_dna	2458	1122	14912	17370
9qtel_hub_3671779_hs1_dna	100	6	10576	10676
10qtel_hub_3671779_hs1_dna	181	20	6555	6736
11qtel_hub_3671779_hs1_dna	3	0	12758	12761
12qtel_hub_3671779_hs1_dna	33	0	13561	13594
13qtel_hub_3671779_hs1_dna	173	77	22423	22596
14qtel_hub_3671779_hs1_dna	0	0	27644	27644
15qtel_hub_3671779_hs1_dna	68	16	3550	3618
16qtel_hub_3671779_hs1_dna	176	40	8480	8656
17qtel_hub_3671779_hs1_dna	89	29	18909	18998
18qtel_hub_3671779_hs1_dna	2814	269	5022	7836
19qtel_hub_3671779_hs1_dna	4	0	15901	15905
20qtel_hub_3671779_hs1_dna	21	1	3135	3156
21qtel_hub_3671779_hs1_dna	22	2	17531	17553
22qtel_hub_3671779_hs1_dna	22	2	15534	15556
Xqtel_hub_3671779_hs1_dna	40	5	17131	17171
TOTAL	13687	2549	673540	687227

## Sheet: TALES
SID+MOCK								SID+DOX								NLS3+MOCK								NLS3+DOX
	1,2 KB	1,2 KB primary	23,8 KB	#mapped 25KB	20bp	20bp-			1,2 KB	1,2 KB primary	23,8 KB	#mapped 25KB	20bp	20bp-			1,2 KB	1,2 KB primary	23,8 KB	#mapped 25KB	20bp	20bp-			1,2 KB	1,2 KB primary	23,8 KB	#mapped 25KB	20bp	20bp-
1ptel_hub_3671779_hs1_dna	0	0	17505	17505				1ptel_hub_3671779_hs1_dna	0	0	15440	15440				1ptel_hub_3671779_hs1_dna	0	0	19701	19701				1ptel_hub_3671779_hs1_dna	0	0	18675	18675
2ptel_hub_3671779_hs1_dna	7	1	2057	2064				2ptel_hub_3671779_hs1_dna	0	0	1870	1870				2ptel_hub_3671779_hs1_dna	1	1	2379	2380				2ptel_hub_3671779_hs1_dna	2	2	2288	2290
3ptel_hub_3671779_hs1_dna	0	0	8791	8791				3ptel_hub_3671779_hs1_dna	0	0	7835	7835				3ptel_hub_3671779_hs1_dna	0	0	9988	9988				3ptel_hub_3671779_hs1_dna	0	0	9381	9381
4ptel_hub_3671779_hs1_dna	1	1	7637	7638				4ptel_hub_3671779_hs1_dna	1	0	6718	6719				4ptel_hub_3671779_hs1_dna	0	0	8695	8695				4ptel_hub_3671779_hs1_dna	1	0	8329	8330
5ptel_hub_3671779_hs1_dna	475	56	7550	8025				5ptel_hub_3671779_hs1_dna	288	35	6807	7095				5ptel_hub_3671779_hs1_dna	389	42	8898	9287				5ptel_hub_3671779_hs1_dna	387	30	8319	8706
6ptel_hub_3671779_hs1_dna	8	6	22145	22153				6ptel_hub_3671779_hs1_dna	11	9	19458	19469				6ptel_hub_3671779_hs1_dna	6	5	25120	25126				6ptel_hub_3671779_hs1_dna	13	12	23855	23868
7ptel_hub_3671779_hs1_dna	383	3	8077	8460				7ptel_hub_3671779_hs1_dna	115	4	7222	7337				7ptel_hub_3671779_hs1_dna	512	18	9233	9745				7ptel_hub_3671779_hs1_dna	572	23	8556	9128
8ptel_hub_3671779_hs1_dna	909	493	51305	52214				8ptel_hub_3671779_hs1_dna	444	179	41142	41586				8ptel_hub_3671779_hs1_dna	1052	697	65383	66435				8ptel_hub_3671779_hs1_dna	1066	662	73740	74806
9ptel_hub_3671779_hs1_dna	47	15	1494	1541				9ptel_hub_3671779_hs1_dna	14	5	1296	1310				9ptel_hub_3671779_hs1_dna	77	21	1546	1623				9ptel_hub_3671779_hs1_dna	75	10	1525	1600
10ptel_hub_3671779_hs1_dna	8	1	3236	3244				10ptel_hub_3671779_hs1_dna	5	0	2850	2855				10ptel_hub_3671779_hs1_dna	10	1	3677	3687				10ptel_hub_3671779_hs1_dna	13	0	3500	3513
11ptel_hub_3671779_hs1_dna	79	56	1597	1676				11ptel_hub_3671779_hs1_dna	24	13	1411	1435				11ptel_hub_3671779_hs1_dna	105	80	1690	1795				11ptel_hub_3671779_hs1_dna	135	101	1648	1783
12ptel_hub_3671779_hs1_dna	62	2	6524	6586				12ptel_hub_3671779_hs1_dna	19	2	5670	5689				12ptel_hub_3671779_hs1_dna	103	5	7140	7243				12ptel_hub_3671779_hs1_dna	93	2	6986	7079
13ptel_hub_3671779_hs1_dna	76	11	2634	2710				13ptel_hub_3671779_hs1_dna	87	14	2627	2714				13ptel_hub_3671779_hs1_dna	77	7	1590	1667				13ptel_hub_3671779_hs1_dna	46	5	1398	1444
14ptel_hub_3671779_hs1_dna	85	43	1569	1654				14ptel_hub_3671779_hs1_dna	101	42	1473	1574				14ptel_hub_3671779_hs1_dna	207	102	2216	2423				14ptel_hub_3671779_hs1_dna	154	73	1855	2009
15ptel_hub_3671779_hs1_dna	0	0	7760	7760				15ptel_hub_3671779_hs1_dna	1	0	6855	6856				15ptel_hub_3671779_hs1_dna	0	0	8823	8823				15ptel_hub_3671779_hs1_dna	1	0	8431	8432
16ptel_hub_3671779_hs1_dna	63	5	9490	9553				16ptel_hub_3671779_hs1_dna	16	2	8420	8436				16ptel_hub_3671779_hs1_dna	90	12	10540	10630				16ptel_hub_3671779_hs1_dna	85	12	9989	10074
17ptel_hub_3671779_hs1_dna	52	52	796	848				17ptel_hub_3671779_hs1_dna	45	45	650	695				17ptel_hub_3671779_hs1_dna	22	22	951	973				17ptel_hub_3671779_hs1_dna	36	36	857	893
18ptel_hub_3671779_hs1_dna	21	3	3453	3474				18ptel_hub_3671779_hs1_dna	11	2	3000	3011				18ptel_hub_3671779_hs1_dna	14	4	3940	3954				18ptel_hub_3671779_hs1_dna	12	1	3725	3737
19ptel_hub_3671779_hs1_dna	313	77	1636	1949				19ptel_hub_3671779_hs1_dna	89	18	1428	1517				19ptel_hub_3671779_hs1_dna	428	105	1706	2134				19ptel_hub_3671779_hs1_dna	364	101	1679	2043
20ptel_hub_3671779_hs1_dna	234	30	12152	12386				20ptel_hub_3671779_hs1_dna	50	11	10636	10686				20ptel_hub_3671779_hs1_dna	381	73	13635	14016				20ptel_hub_3671779_hs1_dna	448	78	12883	13331
21ptel_hub_3671779_hs1_dna	17	6	8248	8265				21ptel_hub_3671779_hs1_dna	13	3	7249	7262				21ptel_hub_3671779_hs1_dna	16	7	9528	9544				21ptel_hub_3671779_hs1_dna	9	1	9113	9122
22ptel_hub_3671779_hs1_dna	3310	31	5346	8656				22ptel_hub_3671779_hs1_dna	3031	22	4635	7666				22ptel_hub_3671779_hs1_dna	3847	45	6197	10044				22ptel_hub_3671779_hs1_dna	3610	41	5978	9588
Xptel_hub_3671779_hs1_dna	113	113	23637	23750				Xptel_hub_3671779_hs1_dna	108	108	21221	21329				Xptel_hub_3671779_hs1_dna	126	126	26275	26401				Xptel_hub_3671779_hs1_dna	110	110	25314	25424
1qtel_hub_3671779_hs1_dna	239	4	11643	11882				1qtel_hub_3671779_hs1_dna	47	1	10270	10317				1qtel_hub_3671779_hs1_dna	406	10	13298	13704				1qtel_hub_3671779_hs1_dna	466	9	12554	13020
2qtel_hub_3671779_hs1_dna	3	0	4437	4440				2qtel_hub_3671779_hs1_dna	1	0	3810	3811				2qtel_hub_3671779_hs1_dna	2	0	5052	5054				2qtel_hub_3671779_hs1_dna	1	0	4919	4920
3qtel_hub_3671779_hs1_dna	53	21	1813	1866				3qtel_hub_3671779_hs1_dna	15	6	1657	1672				3qtel_hub_3671779_hs1_dna	68	26	2029	2097				3qtel_hub_3671779_hs1_dna	93	36	1999	2092
4qtel_hub_3671779_hs1_dna	261	127	10786	11047				4qtel_hub_3671779_hs1_dna	48	17	9039	9087				4qtel_hub_3671779_hs1_dna	444	278	12642	13086				4qtel_hub_3671779_hs1_dna	498	312	13285	13783
5qtel_hub_3671779_hs1_dna	346	4	11560	11906				5qtel_hub_3671779_hs1_dna	98	0	10201	10299				5qtel_hub_3671779_hs1_dna	461	62	13189	13650				5qtel_hub_3671779_hs1_dna	506	69	12261	12767
6qtel_hub_3671779_hs1_dna	259	54	17239	17498				6qtel_hub_3671779_hs1_dna	162	36	15244	15406				6qtel_hub_3671779_hs1_dna	230	40	19335	19565				6qtel_hub_3671779_hs1_dna	225	53	18303	18528
7qtel_hub_3671779_hs1_dna	1364	1316	20150	21514				7qtel_hub_3671779_hs1_dna	913	878	17981	18894				7qtel_hub_3671779_hs1_dna	1297	1252	22796	24093				7qtel_hub_3671779_hs1_dna	1301	1260	21715	23016
8qtel_hub_3671779_hs1_dna	2481	1140	7624	10105				8qtel_hub_3671779_hs1_dna	2062	957	6839	8901				8qtel_hub_3671779_hs1_dna	2917	1352	8640	11557				8qtel_hub_3671779_hs1_dna	3077	1452	8410	11487
9qtel_hub_3671779_hs1_dna	377	27	5361	5738				9qtel_hub_3671779_hs1_dna	106	2	4786	4892				9qtel_hub_3671779_hs1_dna	436	30	6222	6658				9qtel_hub_3671779_hs1_dna	509	34	5741	6250
10qtel_hub_3671779_hs1_dna	481	34	8110	8591				10qtel_hub_3671779_hs1_dna	145	9	6354	6499				10qtel_hub_3671779_hs1_dna	565	47	9665	10230				10qtel_hub_3671779_hs1_dna	660	52	10412	11072
11qtel_hub_3671779_hs1_dna	55	4	6886	6941				11qtel_hub_3671779_hs1_dna	32	6	6066	6098				11qtel_hub_3671779_hs1_dna	34	3	7766	7800				11qtel_hub_3671779_hs1_dna	19	2	7429	7448
12qtel_hub_3671779_hs1_dna	551	34	10784	11335				12qtel_hub_3671779_hs1_dna	327	16	9251	9578				12qtel_hub_3671779_hs1_dna	510	22	12460	12970				12qtel_hub_3671779_hs1_dna	432	19	12292	12724
13qtel_hub_3671779_hs1_dna	330	43	11677	12007				13qtel_hub_3671779_hs1_dna	104	14	10331	10435				13qtel_hub_3671779_hs1_dna	348	40	12976	13324				13qtel_hub_3671779_hs1_dna	432	44	12376	12808
14qtel_hub_3671779_hs1_dna	0	0	14185	14185				14qtel_hub_3671779_hs1_dna	0	0	12671	12671				14qtel_hub_3671779_hs1_dna	0	0	16018	16018				14qtel_hub_3671779_hs1_dna	3	2	15397	15400
15qtel_hub_3671779_hs1_dna	269	22	1549	1818				15qtel_hub_3671779_hs1_dna	82	10	1421	1503				15qtel_hub_3671779_hs1_dna	335	26	1670	2005				15qtel_hub_3671779_hs1_dna	321	29	1651	1972
16qtel_hub_3671779_hs1_dna	412	144	4416	4828				16qtel_hub_3671779_hs1_dna	121	27	3922	4043				16qtel_hub_3671779_hs1_dna	514	127	4948	5462				16qtel_hub_3671779_hs1_dna	606	169	4863	5469
17qtel_hub_3671779_hs1_dna	300	30	9558	9858				17qtel_hub_3671779_hs1_dna	60	11	8663	8723				17qtel_hub_3671779_hs1_dna	478	77	10763	11241				17qtel_hub_3671779_hs1_dna	556	83	10226	10782
18qtel_hub_3671779_hs1_dna	1469	167	13694	15163				18qtel_hub_3671779_hs1_dna	1320	146	10315	11635				18qtel_hub_3671779_hs1_dna	1655	214	15979	17634				18qtel_hub_3671779_hs1_dna	1658	197	18680	20338
19qtel_hub_3671779_hs1_dna	7	2	9129	9136				19qtel_hub_3671779_hs1_dna	2	0	7872	7874				19qtel_hub_3671779_hs1_dna	5	1	10515	10520				19qtel_hub_3671779_hs1_dna	7	0	10283	10290
20qtel_hub_3671779_hs1_dna	107	6	1511	1618				20qtel_hub_3671779_hs1_dna	22	0	1300	1322				20qtel_hub_3671779_hs1_dna	135	20	1560	1695				20qtel_hub_3671779_hs1_dna	149	15	1590	1739
21qtel_hub_3671779_hs1_dna	223	28	9261	9484				21qtel_hub_3671779_hs1_dna	46	6	8313	8359				21qtel_hub_3671779_hs1_dna	369	34	10532	10901				21qtel_hub_3671779_hs1_dna	426	30	10099	10525
22qtel_hub_3671779_hs1_dna	247	28	10399	10646				22qtel_hub_3671779_hs1_dna	53	4	8733	8786				22qtel_hub_3671779_hs1_dna	431	31	11812	12243				22qtel_hub_3671779_hs1_dna	488	45	11953	12441
Xqtel_hub_3671779_hs1_dna	96	13	9336	9432				Xqtel_hub_3671779_hs1_dna	26	4	8365	8391				Xqtel_hub_3671779_hs1_dna	163	16	10466	10629				Xqtel_hub_3671779_hs1_dna	159	24	9908	10067
Total	16193	4253	425747	441940	831	3422		Total	10265	2664	369317	379582	242	2422		Total	19266	5081	489184	508450	1214	3867		Total	19824	5236	484370	504194	1354	3882
												sid mock	831	3422														nls mock	1214	3867
												Fold decrease after dox	3.43388	1.41288														Fold decrease after dox	0.896603	0.996136
