# Supplementary material
Source: HighWire-hosted journal article supplement (doi:10.1101/rna.079906.123)
Supplement: Supplemental_TableS3.xlsx [file Supplemental_TableS3.xlsx]

## Sheet: TSS
	U2OS		HEK		HELA
	1KB	1KB primary	1KB	1KB primary	1KB	1KB primary	TSS	Position (T2T)	Comment
1ptel_hub_3671779_hs1_dna	0	0	0	0	0	0	-	-
2ptel_hub_3671779_hs1_dna	8	8	0	0	0	0	cgcgcCCGCGCAGGCgcaga	3879-3889	only in U2OS
3ptel_hub_3671779_hs1_dna	2	2	0	0	0	0	-	-
4ptel_hub_3671779_hs1_dna	2	2	1	1	0	0	-	-
5ptel_hub_3671779_hs1_dna	261	22	297	41	57	6	caggcGCAGAGAGGCgcgcc	3055-3065	only in U2OS and HEK
5ptel_hub_3671779_hs1_dna							ggcgcAGAGAGGCGCgccgc	2999-3009	only in Hela
6ptel_hub_3671779_hs1_dna	1	0	2	0	0	0	-	-
7ptel_hub_3671779_hs1_dna	485	34	64	3	156	6	aactcCGCCCTCGCAaaccg	3915-3925
8ptel_hub_3671779_hs1_dna	492	148	466	200	300	190	ctgcgCCGGCGCAGGagctg	3069-3079
9ptel_hub_3671779_hs1_dna	8	0	9	4	1	0	gctctGCGGCTCTGTgctga	4164-4174	only in U2OS and HEK
10ptel_hub_3671779_hs1_dna	1	1	866	107	3	1	gccggCGCAGGCGCGgaggg	3143-3153	only in HEK
11p_hub_3671779_hs1_dna	113	99	107	84	28	16	ttgctCACGGTGCTGtgcca	2772-2782
12ptel_hub_3671779_hs1_dna	20	2	15	0	3	0	aggcgCAGAGAGGCAcgccg	3618-3628	only in U2OS
13ptel_hub_3671779_hs1_dna	-	-		-			-	-
14ptel_hub_3671779_hs1_dna	-	-		-			-	-
15ptel_hub_3671779_hs1_dna	-	-		-			-	-
16ptel_hub_3671779_hs1_dna	18	2	18	1	5	0	aactcCCCCGGCGCAggcgc	2831-2841	only in U2OS
17ptel_hub_3671779_hs1_dna	6	1	142	3	113	7	aaaatTTACAACTTTtacgt	3007-3017
18ptel_hub_3671779_hs1_dna	2	0	154	14	2	1	cgcggAGGGGCGCGCccagg	2684-2694	only in HEK
19ptel_hub_3671779_hs1_dna	99	14	85	4	70	22	acggaACTCCGCCGGcgcag	2780-2790
20ptel_hub_3671779_hs1_dna	366	87	32	0	25	2	cgccgGCGGAGGCGCagaga	3282-3292
21ptel_hub_3671779_hs1_dna	-	-		-			-	-
22ptel_hub_3671779_hs1_dna	aaataAATAAATAAAtgttg	5805-5815		1255-1265			aaataAATAAATAAAtgttg	5805-5815
Xptel_hub_3671779_hs1_dna	24	0	111	5	34	0	ccaatTCCAGACACActagg	6039-6049
1qtel_hub_3671779_hs1_dna	344	2	42	3	43	4	cggcgCGGCGCGCCGgcgca	248383601-248383611
2qtel_hub_3671779_hs1_dna	3	0	3	0	3	0	-	-
3qtel_hub_3671779_hs1_dna	76	32	59	21	21	12	tctgtGCTGAAGAGAacgca	201101266-201101276
4qtel_hub_3671779_hs1_dna	436	241	42	6	45	1	gcggcGCGCCGGCGGaggcg	193572117-193572127
5qtel_hub_3671779_hs1_dna	468	116	63	0	139	1	gcaacTCCGCCCTCGcaaag	182043450-182043460
6qtel_hub_3671779_hs1_dna	121	29	116	39	31	10	ccaccCTCGCAAAGGcggcg	172123354-172123364
7qtel_hub_3671779_hs1_dna	1104	1080	616	579	168	157	gctccGCCCTCGCAAaggcg	160564673-160564683
8qtel_hub_3671779_hs1_dna	57	6	131	13	75	2	aaataCTGGCAAATAgaatc	146255426-146255436
9qtel_hub_3671779_hs1_dna	407	23	103	13	110	6	caactCCGCCCTCGCaaagg	150613823-150613833
10qtel_hub_3671779_hs1_dna	533	26	111	6	180	19	tccggGTGTGTGCTAaagag	134754507-134754517
11qtel_hub_3671779_hs1_dna	15	1	9	1	2	0	cgcagCTCCGCCCTCgcaaa	135125086-135125096
12qtel_hub_3671779_hs1_dna	355	20	192	9	37	1	gctccGCCCTCGCAAaggcc	133321696-133321706
13qtel_hub_3671779_hs1_dna	437	81	86	17	181	80	ggcgcGCGCAGGCGCagaga	113562702-113562712
14qtel_hub_3671779_hs1_dna	1	1	0	0	0	0	-	-
15qtel_hub_3671779_hs1_dna	79	3	58	7	66	11	cgtcgCAAAGGCGCGccgcg	99749811-99749821
16qtel_hub_3671779_hs1_dna	543	190	74	23	176	37	cagagAGGCGCGGGGcgccg	96327220-96327230
17qtel_hub_3671779_hs1_dna	394	50	40	2	31	1	gcgcaCGCAGGCGCAgagac	84273363-84273373
18qtel_hub_3671779_hs1_dna	13	2	37	4	41	5	gcgacAGAGTGAGACtctgt	80538078-80538088
19qtel_hub_3671779_hs1_dna	6	1	6	1	3	0	-	-
20qtel_hub_3671779_hs1_dna	16	0	27	2	13	1	gcgcaGAGAGGCGCCcgcgc	66206665-66206675
21qtel_hub_3671779_hs1_dna	330	21	42	7	28	1	gcggcGCGCCGGCGCaggcg	45085595-45085605
22qtel_hub_3671779_hs1_dna	385	47	37	25	23	2	gcggcGCGCCGGCGCaggcg	51321438-51321448
Xqtel_hub_3671779_hs1_dna	24	0	22	1	27	1	ctcggCCGTCGCAAAggcgc	154256170-154256180
	TSS	Position	Comment	Position on our reference
