# Supplementary material
Source: HighWire-hosted journal article supplement (doi:10.1101/rna.079906.123)
Supplement: Supplemental_TableS4.xlsx [file Supplemental_TableS4.xlsx]

## Sheet: 29bp variants
Cons1	CTCTGCGCCTGCGCCGGCGCGGCGCGCCT
5ptel	CTCTGCGCCTGCGCCGGCGCGGCGCGCCT
9ptel	CTCTGCGCCTGCGCCGGCGCGGCGCGCCT
11ptel	CTCTGCGCCTGCGCCGGCGCGGCGCGCCT
12ptel	CTCTGCGCCTGCGCCGGCGCGGCGCGCCT
16ptel	CTCTGCGCCTGCGCCGGCGCGGCGCGCCT
19ptel	CTCTGCGCCTGCGCCGGCGCGGCGCGCCT
3qtel	CTCTGCGCCTGCGCCGGCGCGGCGCGCCT
11qtel	CTCTGCGCCTGCGCCGGCGCGGCGCGCCT
15qtel	CTCTGCGCCTGCGCCGGCGCGGCGCGCCT
20qtel	CTCTGCGCCTGCGCCGGCGCGGCGCGCCT
21qtel-1	CTCTGCGCCTGCGCCGGCGCGGCGCGCCT
Xqtel	CTCTGCGCCTGCGCCGGCGCGGCGCGCCT
Cons2	CTCTGCGCCTGCGCCGGCGCGCCGCGCCT
1ptel	CTCTGCGCCTGCGCCGGCGCGCCGCGCCT
2qtel	CTCTGCGCCTGCGCCGGCGCGCCGCGCCT
4qtel-1	CTCTGCGCCTGCGCCGGCGCGCCGCGCCT
6qtel	CTCTGCGCCTGCGCCGGCGCGCCGCGCCT
13qtel	CTCTGCGCCTGCGCCGGCGCGCCGCGCCT
19qtel	CTCTGCGCCTGCGCCGGCGCGCCGCGCCT
21qtel-2	CTCTGCGCCTGCGCCGGCGCGCCGCGCCT
22qtel	CTCTGCGCCTGCGCCGGCGCGCCGCGCCT
20ptel-1	CTCTGCGCCTGCGCCGGCGCGCCGCGCCT
5qtel-1	CTCTGCGCCTGCGCCGGCGCGCCGCGCCT
7ptel-1	CTCTGCGCCTGCGCCGGCGCGCCGCGCCT
9qtel-1	CTCTGCGCCTGCGCCGGCGCGCCGCGCCT
16qtel-1	CTCTGCGCCTGCGCCGGCGCGCCGCGCCT
Cons2+1	CTCTGCGCCTGCGCCGGCGCGCCGCGCCT
14qtel	CTCTGCGCCTGCGCGGGCGCGCCGCGCCT
7ptel-2	CTCTGCGCCTGCGCCGGCGCCCCGCGCCT
5qtel-2	CTCTGCGCCTGCGCCGGCGCCCCGCGCCT
10qtel	CTCTGCGCCTGCGCCGGCGCCCCGCGCCT
16qtel-2	CTCTGCGCCTGCGCCGGCGCCCCGCGCCT
20ptel-2	CTCTGCGCCTCCGCCGGCGCGCCGCGCCT
4qtel-2	CTCTGCGCCTCCGCCGGCGCGCCGCGCCT
9qtel-2	CTCTGCGCCTGCGCCGGCGCCCCGCGCCT
Cons2+2
9qtel-3	CTCTGCGCCTCCGCCGGCGCCCCGCGCCT
Cons1+n
3ptel	CTCTGCGCCTGCGCCGGCGCCGCGCGCCT
7qtel	CTCTGCGCCTGCGCCGGCGCGGGGCGCCT
2ptel-1	CTCTGCGCCTGCGCGGGCGCGGTGCGCCT
18ptel	CTCCGCGCCTGCGCCGGCGCTGCGCGCCC
12qtel-2	CTCTGCGCCTGTGCCGGCGCGGGGGGCCT
2ptel-2	GTGTGCGCCTGCGCGGGCGCGGTGCGCCT
4ptel	CTCTGCGCCTGCGCCGCGGCGGCGTCCGT
15ptel	CTCTGCGCCTGCGCCGCGGCGGCGTCCGT
10ptel	CTCCGCGCCTGCGCCGGCGCTGCGCGCCC
Cons1+gap
12qtel-1	CTCTGCGCCCCGCGCCGGCGCGGGGCGCCT
Cons3	CTCTGCGCCTCCGCCGGCGCGCCGCGCCGCGCCT
1qtel	CTCTGCGCCTCCGCCGGCGCGCCGCGCCGCGCCT
17qtel	GTCTGCGCCTGCGCCGGCGCGCCGCGCCGCGCCT

## Sheet: 29bp Hg38 vs T2T
			hg38				CHM13
#	Region	Arm		29bp	#copies	Coord_in_hg38mod	29bp	#copies	Coord_in_CHM13
1	1ptel	p		yes	6	chr1:189-361	yes	17.7	chr1:2710-3219
2	2ptel	p		yes	16	chr2:590-1052	yes	28	chr2:3871-4681
3	3ptel	p		yes	26.3	chr3:172-935	yes	26.5	chr3:2646-3413
4	4ptel	p		yes	7	chr4:644-847	yes	9	chr4:3885-4146
5	5ptel	p		yes	17.3	chr5:678-1158	yes	19.3	chr5:2863-3421
6	6ptel	p	**	-	-		-	-	-
7	7ptel	p		-	-		yes	18.9	chr7:3938-4485
8	8ptel	p	**	-	-		-	-	-
9	9ptel	p		yes	2.6	chr9:641-716	yes	22.6	chr9:4196-4851
10	10ptel	p		yes	2.1	chr10:332-393	yes	40.1	chr10:2639-3802
11	11ptel	p	**	-	-		yes	8.7	chr11:2137-2388
12	12ptel	p		yes	7.7	chr12:177-399	yes	15.6	chr12:3607-4059
13	13ptel	p					-	-	-
14	14ptel	p					-	-	-
15	15ptel	p					yes	11	chr15:3,880-4,199
16	16ptel	p		yes	2.2	chr16:555-619	yes	24.6	chr16:2834-3547
17	17ptel	p		-	-		-	-	-
18	18ptel	p		yes	6.7	chr18:327-527	yes	21.1	chr18:2314-2926
19	19ptel	p		-	-		yes	20.6	chr19:2785-3382
20	20ptel	p		-	-		yes	13.2	chr20:3243-3626
21	21ptel						-	-	-
22	22ptel						-	-	-
23	Xptel	p		-	-		-	-	-
23	1qtel	q		yes	3.3	chr1:681-774	yes*	4.2	chr1:248383464-248383606
24	2qtel	q		yes	8.2	chr2:667-904	yes	26.1	chr2:242693270-242694026
25	3qtel	q		-	-		yes	11.7	chr3:201100845-201101183
26	4qtel	q		yes	9	chr4:541-781	yes	8.2	chr4:193571874-193572112
27	5qtel	q					yes	19.1	chr5:182042814-182043367
28	6qtel	q					yes	35.1	chr6:172122266-172123283
29	7qtel	q		-	-		yes	29	chr7:160563741-160564609
30	8qtel	q		-	-		-	-	-
31	9qtel	q		-	-		-	14.4	chr9:150613342-150613758
32	10qtel	q		yes	3.1	chr10:603-692	yes	11.1	chr10:134754098-134754419
33	11qtel	q		yes	7.4	chr11:207-421	yes	24.4	chr11:135124290-135124997
34	12qtel	q		yes	2	chr12:691-750	yes	2	chr12:133321552-133321611
35	13qtel	q		yes	5.2	chr13:607-758	yes	12.2	chr13:113562314-113562668
36	14qtel	q		-	-		yes	27.9	chr14:101158998-101159818
37	15qtel	q		yes	3	chr15:590-675	yes	10	chr15:99749464-99749752
38	16qtel	q		-	-		yes	19.1	chr16:96326624-96327177
39	17qtel	q		-	-		yes*	13.2	chr17:84272921-84273364
40	18qtel	q		yes	6.3	chr18:55-236	-	-	-
41	19qtel	q		30bp	11	chr19:257-600	yes	10.4	chr19:61704025-61704325
42	20qtel	q		-	-		yes	13.5	chr20:66206209-66206599
43	21qtel	q		yes	17.2	chr21:568-1067	yes	10.2	chr21:45085306-45085597
44	22qtel	q		yes	2.2	chr22:581-645	yes	11.2	chr22:51321115-51321440
45	Xqtel	q		yes	9	chrX:618-879	yes	9	chrX:154255848-154256109
* number of copies as in hg38
** la sequenza hg38 inizia a 60000 ma non c'è tel-repeat
